# Supplementary material for: Alcohol, But Not Depression or IPV, Reduces HIV Adherence Among South African Mothers Living with HIV Over 5 Years
Source: Springer Nature journal article supplement (doi:10.1007/s10461-019-02617-2), 2019-08-10
Supplement: MOESM1 [file 17056266]

| **Table S1. Characteristics of the sample by Retained (N=443) and Lost to Follow-Up (LTFU) (N=92) groups** | | | | | | |
| --- | --- | --- | --- | --- | --- | --- |
|  | Retained  (N=443) | | LTFU  (N=92) | | Total  (N=535) | |
|  | n | % | n | % | n | % |
| Demographic characteristics |  |  |  |  |  |  |
| Age, mean (SD) | 26.4 (5.7) | | 25.4 (4.7) | | 26.2 (5.5) | |
| Highest education level, mean (SD) ** | 10.3 (1.9) | | 10.7 (1.6) | | 10.3 (1.8) | |
| Currently employed | 85 | 19.2 | 13 | 14.1 | 98 | 18.3 |
| Married or lives with partner | 245 | 55.3 | 50 | 54.4 | 295 | 55.1 |
| Monthly household income > 2000 rand | 210 | 48.5 | 47 | 52.2 | 257 | 49.1 |
| Formal housing** | 154 | 34.8 | 19 | 20.7 | 173 | 32.3 |
| Water on site | 248 | 56.0 | 48 | 52.2 | 296 | 55.3 |
| Flush toilet on site | 260 | 58.7 | 50 | 54.4 | 310 | 57.9 |
| Electricity on site | 405 | 91.4 | 82 | 89.1 | 487 | 91.0 |
| Mother hungry past week | 229 | 51.7 | 38 | 41.3 | 267 | 49.9 |
| Children hungry past week* | 144 | 32.5 | 19 | 20.7 | 163 | 30.5 |
|  |  |  |  |  |  |  |
| Alcohol |  |  |  |  |  |  |
| Drank alcohol prior to discovering pregnancy | 89 | 24.3 | 25 | 32.9 | 114 | 25.7 |
| AUDIT-C > 2, prior to discovery | 70 | 19.1 | 19 | 25.0 | 89 | 20.1 |
| Drank alcohol after to discovering pregnancy | 37 | 10.1 | 8 | 10.5 | 45 | 10.2 |
| AUDIT-C > 2, after pregnancy discovery | 18 | 4.9 | 4 | 5.3 | 22 | 5.0 |
| Any alcohol while pregnant | 111 | 25.1 | 27 | 29.4 | 138 | 25.8 |
| Problematic alcohol use | 12 | 3.3 | 4 | 5.3 | 16 | 3.6 |
|  |  |  |  |  |  |  |
| Maternal health and mental health |  |  |  |  |  |  |
| Weeks pregnant at assessment, mean (SD) | 26.6 (7.9) | | 26.6 (8.1) | | 26.6 (7.9) | |
| Non-primipara* | 302 | 68.2 | 53 | 57.6 | 355 | 66.4 |
| Previous low birth weight infant | 52 | 17.2 | 10 | 18.9 | 62 | 17.5 |
| EPDS, mean (SD) | 10.3 (6.9) | | 9.1 (7.3) | | 10.1 (7.0) | |
| EPDS > 13 | 145 | 32.7 | 22 | 23.9 | 167 | 31.2 |
|  |  |  |  |  |  |  |
| HIV and reproductive health behavior |  |  |  |  |  |  |
| Recent sexual partnera | 390 | 88.0 | 80 | 87.0 | 470 | 87.9 |
| Knowledge of partner HIV status* |  |  |  |  |  |  |
| Partner HIV+ | 34 | 8.7 | 6 | 7.5 | 40 | 8.5 |
| Partner HIV- | 218 | 55.9 | 57 | 71.3 | 275 | 58.5 |
| Partner serostatus unknown | 138 | 35.4 | 17 | 21.3 | 155 | 33.0 |
| Request partner HIV test | 261 | 82.9 | 60 | 85.7 | 321 | 83.4 |
| Ever tested for HIV | 418 | 94.4 | 88 | 95.7 | 506 | 94.6 |
| Received HIV test results* (n=506) | 418 | 100.0 | 87 | 98.9 | 505 | 99.8 |
| Mothers living with HIV | 128 | 30.6 | 27 | 31.0 | 155 | 30.7 |
| Had a recent sexual partnera | 113 | 88.3 | 21 | 77.8 | 134 | 86.5 |
| Disclosed HIV status to partner | 78 | 82.1 | 13 | 86.7 | 91 | 82.7 |
| Number of people disclosed to, mean (SD) | 5.0 (6.3) | | 3.5 (3.5) | | 4.7 (5.9) | |
| a “Recent” refers to the last three months; * p ≤ 0.05 ** p ≤ 0.01 | | | | | | |
